# Supplementary material for: A practical approach to synthesize polyamide thin film nanocomposite (TFN) membranes with improved separation properties for water/wastewater treatment
Source: Royal Society of Chemistry journal article supplement (doi:10.1039/c5ta09252c), 2016-01-01
Supplement: c5ta09252c1.pdf [file c5ta09252c1.pdf]

### **List of Supplementary Figures**

- Figure S1. Determination of molecular weight cut-off (MWCO) of PSF substrate based on neutral solute rejection profile
- Figure S2. FTIR spectra of (a) TFC, (b) TFN<sub>aq-0.05</sub> and (c) TFN<sub>cyclo-0.05</sub>
- Figure S3. FTIR spectra of the interaction between NH<sub>2</sub>-TNTs and TMC monomer
- Figure S4. TGA curves of TFN<sub>cyclo-</sub> and TFN<sub>aq-</sub> membrane
- Figure S5. 3D AFM images of the membrane top surface together with surface roughness values,  $R_q$  (root mean square of z data),  $R_a$  (mean roughness) and  $R_z$  (mean difference in the height between the five highest peaks and the five lowest peaks), (a) TFC, (b) TFN<sub>aq-0.05</sub> and (c) TFN<sub>cyclo-0.05</sub>. All surface roughness values are in nm.

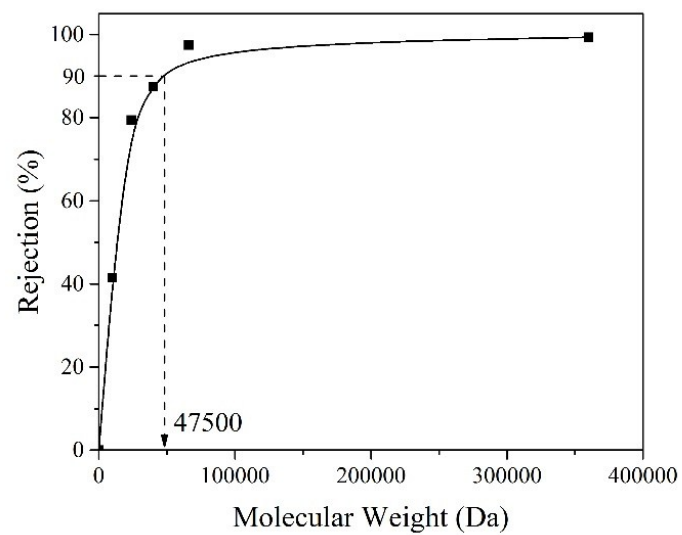

Figure S1. Determination of molecular weight cut-off (MWCO) of PSF substrate based on neutral solute rejection profile

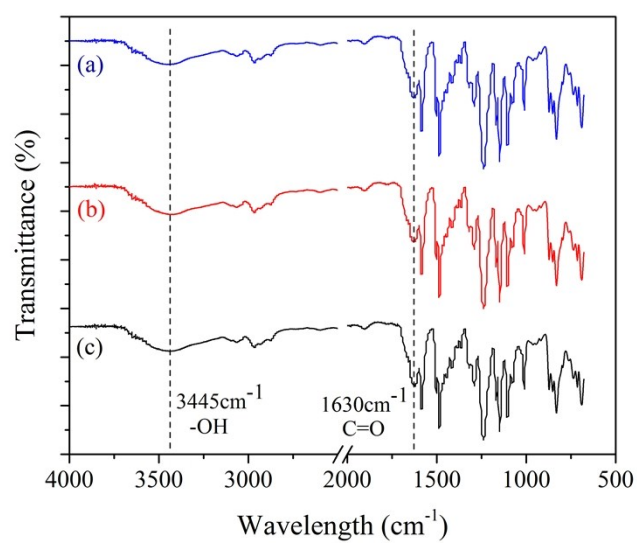

Figure S2. FTIR spectra of (a) TFC, (b) TFN<sub>aq-0.05</sub> and (c) TFN<sub>cyclo-0.05</sub>

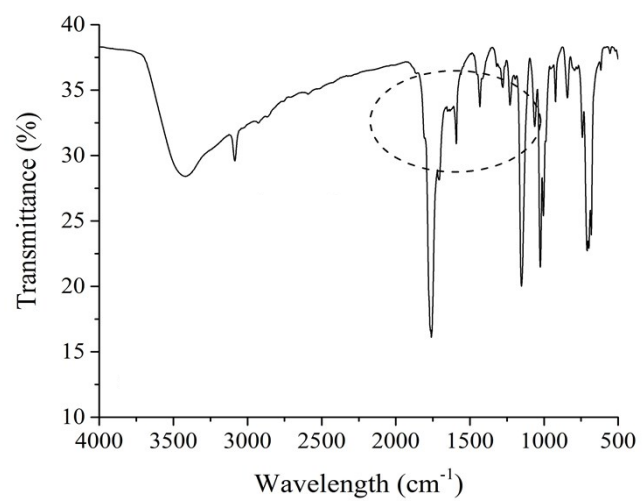

Figure S3. FTIR spectra of the interaction between NH<sub>2</sub>-TNTs and TMC monomer

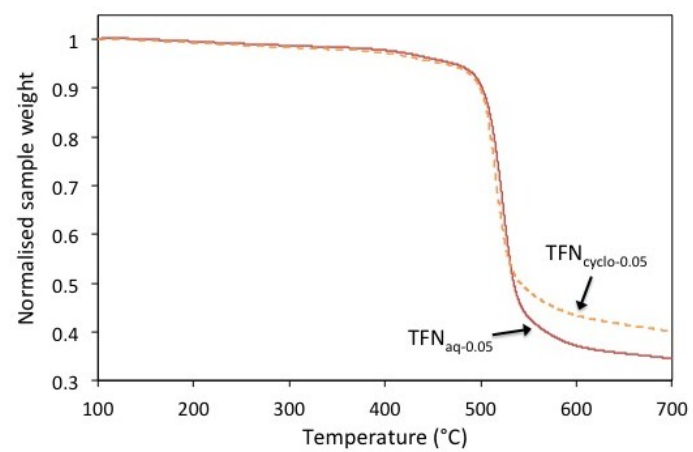

Figure S4. TGA curves of TFN<sub>cyclo-</sub> and TFN<sub>aq-</sub> membrane

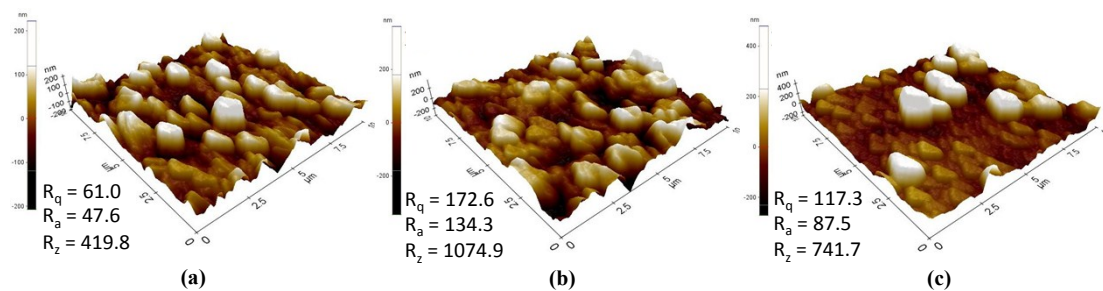

Figure S5. 3D AFM images of the membrane top surface together with surface roughness values,  $R_q$  (root mean square of z data),  $R_a$  (mean roughness) and  $R_z$  (mean difference in the height between the five highest peaks and the five lowest peaks), (a) TFC, (b) TFN<sub>aq-0.05</sub> and (c) TFN<sub>cyclo-0.05</sub>. All surface roughness values are in nm.
